# Supplementary material
Source: publisher figshare collection journal article supplement (https://sage.figshare.com/ndownloader/files/12918545)
Supplement: Supplementary file 1 [file 12918545]

**Supplemental Table 2.** Methodological quality assessment (risk of bias) of included studies by Newcastle-Ottawa Scales

| Study         | Selection      |                   |                           |                     | Comparability | Outcome               |                     |                       |
|---------------|----------------|-------------------|---------------------------|---------------------|---------------|-----------------------|---------------------|-----------------------|
|               | Exposed Cohort | Nonexposed Cohort | Ascertainment of exposure | Outcome of interest |               | Assessment of outcome | Length of follow-up | Adequacy of follow-up |
| Seidler 2016  | *              | *                 | *                         | *                   | **            | *                     | *                   | -                     |
| Naismith 2013 | *              | *                 | *                         | *                   | **            | *                     | -                   | *                     |

**Supplemental Table 1.** Risk of bias assessment of included trials by Cochrane Risk of Bias Assessment Tool

| First author, year   | Random sequence generation | Allocation concealment | Blinding of participants and personnel | Blinding of outcome assessment | Incomplete outcome data | Selective reporting | Other bias |
|----------------------|----------------------------|------------------------|----------------------------------------|--------------------------------|-------------------------|---------------------|------------|
| Beck 2017            | Low                        | Low                    | Low                                    | Low                            | Low                     | Low                 | Low        |
| Cubo 2017            | Low                        | Unclear                | Unclear                                | Unclear                        | Unclear                 | Low                 | Low        |
| Heldman 2017         | Unclear                    | Unclear                | High                                   | High                           | Low                     | Low                 | Low        |
| Lakshminarayana 2017 | Low                        | Low                    | Low                                    | Unclear                        | Low                     | Low                 | Low        |
| Khalil 2017          | Low                        | Low                    | Unclear                                | Low                            | Unclear                 | Unclear             | Low        |
| Wilkinson 2016       | Low                        | High                   | Unclear                                | High                           | Low                     | Low                 | Low        |
| Patel 2016           | Unclear                    | Low                    | High                                   | Unclear                        | Low                     | Low                 | Low        |
| Ginis 2016           | Low                        | High                   | High                                   | High                           | Low                     | Low                 | Low        |
| Theodoros 2016       | Unclear                    | High                   | Unclear                                | Low                            | Low                     | Low                 | Low        |
| Dorsey 2013          | Low                        | High                   | High                                   | High                           | Unclear                 | High                | Low        |
| Dorsey 2010          | Low                        | High                   | High                                   | High                           | Unclear                 | Low                 | Low        |

**Supplemental Table 3.** Quality assessment of included studies by modified Newcastle-Ottawa Scales

| Study authors    | Selection      |                           |                     | Comparability | Outcome               |                     |                       |
|------------------|----------------|---------------------------|---------------------|---------------|-----------------------|---------------------|-----------------------|
|                  | Exposed Cohort | Ascertainment of exposure | Outcome of interest |               | Assessment of outcome | Length of follow-up | Adequacy of follow-up |
| Butterfield 2017 | *              | *                         | *                   | *             | *                     | -                   | *                     |
| Dibilio 2017     | *              | *                         | *                   | *             | *                     | -                   | -                     |
| Barbour 2016     | *              | *                         | *                   | *             | *                     | *                   | *                     |
| Kraepelien 2015  | *              | *                         | *                   | *             | *                     | *                   | -                     |
| Milman 2014      | *              | *                         | *                   | *             | *                     | *                   | *                     |
| Marzinzik 2012   | *              | *                         | *                   | *             | *                     | -                   | *                     |
| Dobkin 2011      | *              | *                         | *                   | *             | *                     | -                   | -                     |
| Veazey 2009      | *              | *                         | *                   | *             | *                     | -                   | *                     |
